# Supplementary material for: Diversity-oriented multi-compound synthesis optimization
Source: Royal Society of Chemistry journal article supplement (doi:10.1039/d3re00610g), 2024-01-01
Supplement: d3re00610g2.pdf [file d3re00610g2.pdf]

Suppl. 4: Reactions for typical route selections

The following tables list the reactions utilized in two typical route selection scenarios

(see Section 3.3 and Table 1).

It turns out that most of the synthesis procedures are quite common, which makes our method a useful tool for synthetic chemists.

| <b>Reactions Rgroup Enumeration 18x18</b> | <b>Frequency</b> |
|-------------------------------------------|------------------|
| Imidazole synthesis                       | 23               |
| Fluoro N-arylation                        | 10               |
| Bromo N-arylation                         | 9                |
| SNAr ether synthesis                      | 9                |
| Fluorination                              | 5                |
| Unrecognized                              | 5                |
| Carboxylic ester + amine reaction         | 3                |
| Friedel-Crafts acylation                  | 2                |
| Bromo Sonogashira coupling                | 1                |
| Carboxylic acid to acid chloride          | 1                |
| Ullmann-type biaryl coupling              | 1                |
| Bromo N-arylation                         | 1                |
| Wurtz-Fittig coupling                     | 1                |
| Carboxylic acid to acid chloride          | 1                |
| Aldehyde reductive amination              | 1                |

| <b>Reactions MMP Transformation 5x5</b> | <b>Frequency</b> |
|-----------------------------------------|------------------|
| Carboxylic acid + amine condensation    | 24               |
| Methoxy to hydroxy                      | 11               |
| Williamson ether synthesis              | 8                |
| Mitsunobu aryl ether synthesis          | 3                |
| Unrecognized                            | 2                |
